# Supplementary material for: High-Throughput-Methyl-Reading (HTMR) assay: a solution based on nucleotide methyl-binding proteins enables large-scale screening for DNA/RNA methyltransferases and demethylases
Source: PubMed Central journal article supplement (PMC8789064; doi:10.1093/nar/gkab989), 2021-10-29
Supplement: gkab989_supplemental_file.pdf [file gkab989_supplemental_file.pdf]

---

## Supplemental Information

### **High-Throughput-Methyl-Reading (HTMR) Assay: a solution based on Nucleotide Methyl-Binding Proteins enables large-scale screening for DNA/RNA Methyltransferases and Demethylases**

Senhao Xiao<sup>1,2,3</sup>, Siqi Guo<sup>1</sup>, Jie Han<sup>1</sup>, Yanli Sun<sup>1,6</sup>, Mingchen Wang<sup>1,2,3</sup>, Yantao Chen<sup>1</sup>, Xueyu Fang<sup>1,2,3</sup>, Feng Yang<sup>1,5</sup>, Yajuan Mu<sup>7</sup>, Liang Zhang<sup>7</sup>, Yiluan Ding<sup>3,4</sup>, Naixia Zhang<sup>3,4</sup>, Hualiang Jiang<sup>1,2,3</sup>, Kaixian Chen<sup>1,2,3</sup>, Kehao Zhao<sup>6</sup>, Cheng Luo<sup>1,3,4,8</sup> and Shijie Chen<sup>1,3,4\*</sup>

<sup>1</sup>The Center for Chemical Biology, Drug Discovery and Design Center, State Key Laboratory of Drug Research, Shanghai Institute of Materia Medica, Chinese Academy of Sciences, Shanghai, 201203, China

<sup>2</sup>School of Life Science and Technology, Shanghai Tech University, Shanghai 201210, China

<sup>3</sup>University of Chinese Academy of Sciences, No.19A Yuquan Road, Beijing 100049, China

<sup>4</sup>CAS Key Laboratory of Receptor Research, Shanghai Institute of Materia Medica, Chinese Academy of Sciences, Shanghai 201203, China.

<sup>5</sup>School of Pharmacy, Fudan University, Shanghai, 201203, China

<sup>6</sup>School of Pharmacy, Key Laboratory of Molecular Pharmacology and Drug Evaluation (Yantai University), Ministry of Education; Collaborative Innovation Center of Advanced Drug Delivery System and Biotech Drugs in Universities of Shandong, Yantai University, Yantai 264005, China

<sup>7</sup>Department of Pharmacology and Chemical Biology, State Key Laboratory of Oncogenes and Related Genes, Shanghai Jiao Tong University School of Medicine, Shanghai, 200025, China

<sup>8</sup>School of Pharmaceutical Science and Technology, Hangzhou Institute for Advanced Study, UCAS, Hangzhou 310024, China

\* To whom correspondence should be addressed. Tel:86-021-50806600;

Email:[shijiechen@simm.ac.cn](mailto:shijiechen@simm.ac.cn);

Present Address: Shijie Chen, Drug Discovery and Design Center, Shanghai Institute of Materia Medica, CAS, Zuchongzhi Road 555, Shanghai, 201203, China.

**Table S1. The oligonucleotides used in this study.**

| <b>12bp-CpG containing dsDNA</b>       | <b>Sequence</b>                                                               |                                               |
|----------------------------------------|-------------------------------------------------------------------------------|-----------------------------------------------|
| unmethylated dsDNA- [C/C]              | top strand: 5'-FAM-TACGACCAGGAT-3'<br>bottom strand: 5'-ATCCTGGTCGTA-3'       |                                               |
| hemi-methylated dsDNA- [M/C]           | top strand: 5'-FAM-TA5mCGACCAGGAT-3'<br>bottom strand: 5'-ATCCTGGTCGTA-3'     | substrate for DNMT1                           |
| fully-methylated dsDNA-[M/M]           | top strand: 5'-FAM-TA5mCGACCAGGAT-3'<br>bottom strand: 5'-ATCCTGGT5mCGTA-3'   | product for DNMT1<br>substrate for TET2       |
| fully-hydroxymethylated dsDNA-[H/H]    | top strand: 5'-FAM-TA5hmCGACCAGGAT-3'<br>bottom strand: 5'-ATCCTGGT5hmCGTA-3' | main product for TET2                         |
| fully-carboxylated dsDNA-[caC/caC]     | top strand: 5'-FAM-TA5caCGACCAGGAT-3'<br>bottom strand: 5'-ATCCTGGT5caCGTA-3' | final product for TET2                        |
| <b>16nt GGACU motif containing RNA</b> | <b>Sequence</b>                                                               |                                               |
| unmodified RNA                         | 5'-FAM-GAACCGGACUGUCUUA-3',                                                   | substrate for METTL3/14<br>product for ALKBH5 |
| m6A-modified RNA                       | 5'-FAM-GAACCGGm6ACUGUCUUA-3',                                                 | substrate for ALKBH5<br>product for METTL3/14 |

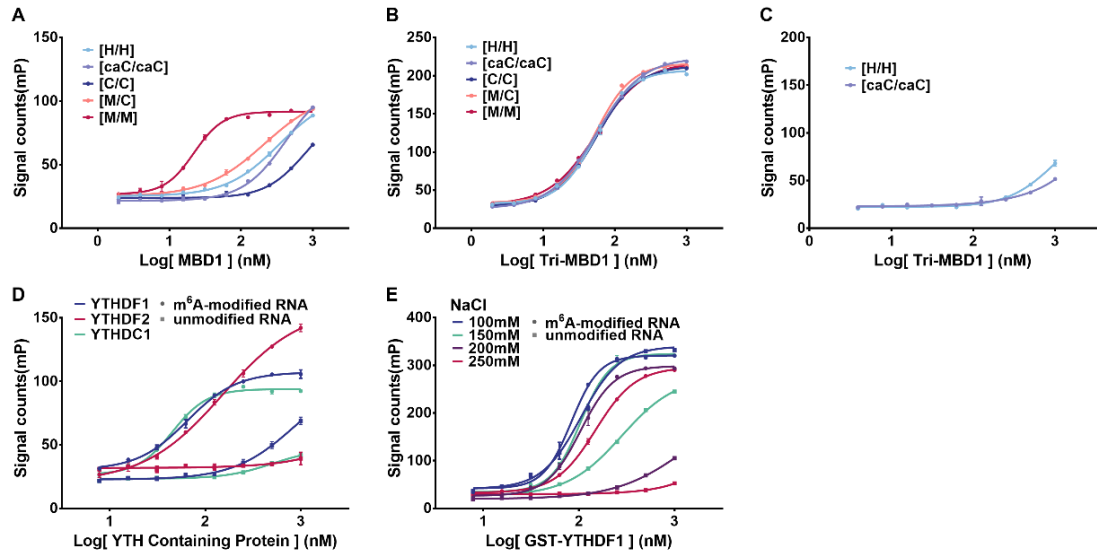

**Figure. S1.** Titration of the fluorescence-labeled oligonucleotides at different modification statuses with methyl-binding proteins. (A) untagged MBD1 with [C/C] (unmethylated DNA), [H/H] (fully-hydroxymethylated DNA), [caC/caC] (fully-carboxylated DNA), [M/C] (hemi-methylated DNA), and [M/M] (fully-methylated DNA) in 150 mM NaCl, (B) tri-MBD1 with [C/C], [H/H], [caC/caC], [M/C], and [M/M] in 150 mM NaCl. (C) tri-MBD1 with [H/H] and [caC/caC] in 300 mM NaCl. M, H, caC, C, represent methylated, hydroxymethylated, carboxylated, and unmodified cytosine in dsDNA. (D) YTH domain containing proteins-YTHDF1, YTHDF2, YTHDC1 with m<sup>6</sup>A modified RNA and unmodified RNA in 150 mM NaCl. (E) GST-YTHDF1 with m<sup>6</sup>A modified RNA and unmodified RNA in different concentrations of NaCl. All samples were performed in triplicate. The error bars were showed as mean  $\pm$  SD (n = 3).

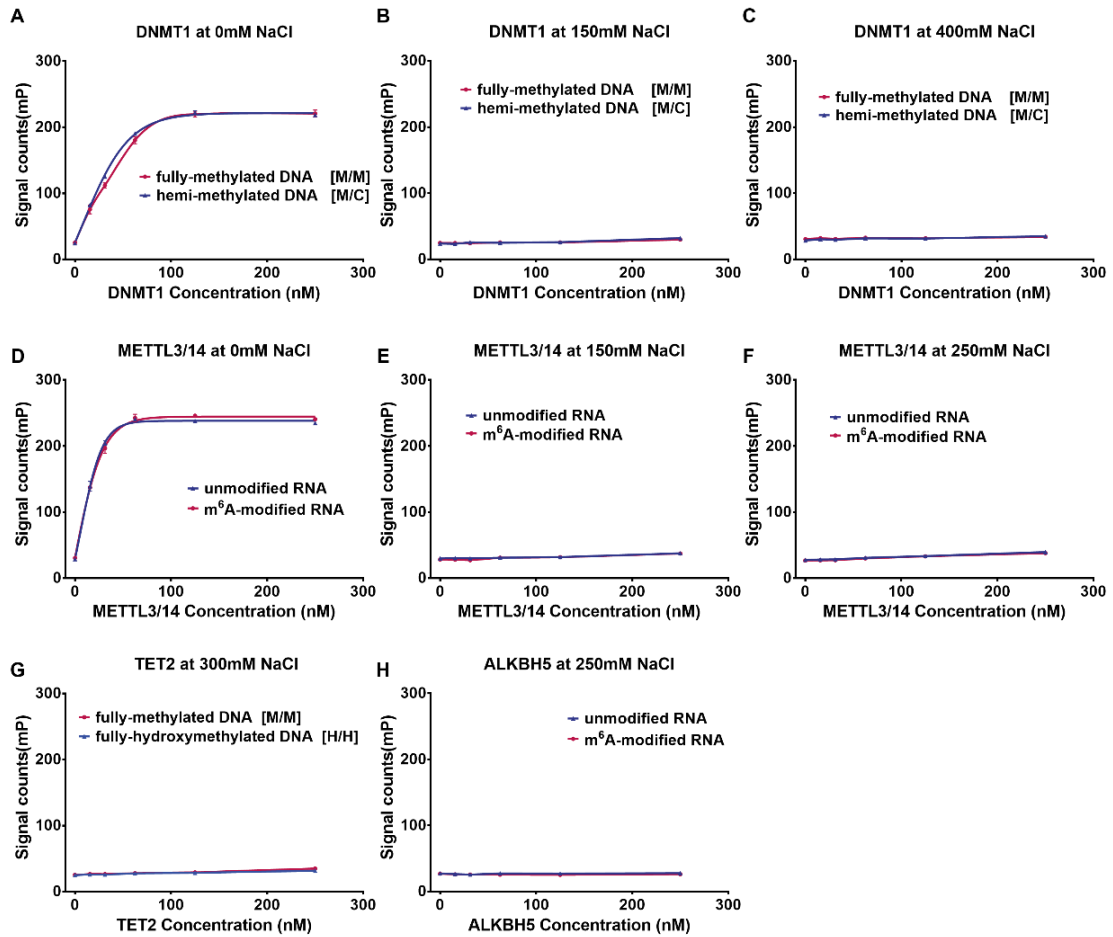

**Figure. S2.** FP binding curves of the enzymes. DNMT1 in a buffer containing (A) 0 mM, (B) 150 mM, (C) 400 mM NaCl. METTL3/14 in a buffer containing (D) 0 mM, (E) 150 mM, (F) 250 mM NaCl. (G) TET2 in a buffer containing 300 mM NaCl. (H) ALKBH5 in a buffer containing 250 mM NaCl. All samples were performed in triplicate. The error bars were showed as mean  $\pm$  SD (n = 3).

a) Determination of [P]

$$K_A = \frac{[A][P]}{[AP]}$$

$$K_B = \frac{[B][P]}{[BP]}$$

$$P_{total} \approx P_{free}$$

$$Total\ fluorescence\ probe\ A_{total} = B_{total} = AP + A_{free} = BP + B_{free}$$

$$Binding\ Rate = \frac{mP - mP_{min}}{mP_{max} - mP_{min}} = \frac{[AP]}{[A_{total}]}$$

$$\Rightarrow \Delta FP\ Signal = \frac{K_A \cdot K_B}{K_A + K_B + [P] + \frac{K_A \cdot K_B}{[P]}} (mP_{max} - mP_{min}) \leq \frac{1 - \sqrt{\frac{K_B}{K_A}}}{1 + \sqrt{\frac{K_B}{K_A}}} (mP_{max} - mP_{min}), \text{ while } [P] = \sqrt{K_A K_B}$$

$$mP_A = \frac{P_{min} + P_{max} \left(1 + \frac{[P]}{K_A}\right)}{1 + \frac{[P]}{K_A}}$$

$$mP_B = \frac{P_{min} + P_{max} \left(1 + \frac{[P]}{K_B}\right)}{1 + \frac{[P]}{K_B}}$$

c) Diagram of thermo dynamic steady-state

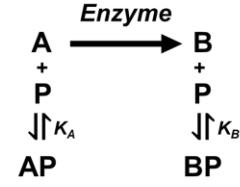

b) Linearity verification

$$K_A = \frac{[A][P]}{[AP]}$$

$$K_B = \frac{[B][P]}{[BP]}$$

$$Total\ fluorescence\ probe = A_{total} + B_{total} = AP + A_{free} + BP + B_{free}$$

$$mP = mP_{min} + (mP_{max} - mP_{min}) \cdot Bind\ Rate$$

$$Bind\ Rate = \frac{[AP] + [BP]}{A_{total} + B_{total}}$$

$$Bind\ Rate = \frac{mP - mP_{min}}{mP_{max} - mP_{min}}$$

$$[P] = \sqrt{K_A K_B}$$

$$\Rightarrow FP\ Signal = mP_{min} + (mP_{max} - mP_{min}) \left[ \frac{A_{total}}{A_{total} + B_{total}} \frac{1}{1 + \sqrt{\frac{K_A}{K_B}}} + \frac{B_{total}}{A_{total} + B_{total}} \frac{1}{1 + \sqrt{\frac{K_B}{K_A}}} \right]$$

$$\approx mP_{min} + (mP_{max} - mP_{min}) \frac{B_{total}}{A_{total} + B_{total}}, \text{ while } K_A \gg K_B$$

$$\approx mP_{min} + (mP_{max} - mP_{min}) \left(1 - \frac{B_{total}}{A_{total} + B_{total}}\right), \text{ while } K_B \gg K_A$$

**Figure. S3.** Equation derivation according to the binding model of methyl-binding protein while reaction proceeds. The calculation ignores the impact of enzyme bind to the fluorescence-labeled oligonucleotides. In the equations,  $A$ ,  $B$ ,  $P$  represent substrate, product, and methyl-binding proteins, respectively.  $AP$  and  $BP$  represent the association form.  $K_A$  and  $K_B$  represent the dissociation constant of substrate and product, respectively.  $mP_{max}$  and  $mP_{min}$  represent the maximum and minimum FP signal in the FP binding assay.  $[P]$  is the concentration of methyl-binding protein in free-state.  $P_{total}$ ,  $A_{total}$ , and  $B_{total}$  are the sum of free from and association form of  $P$ ,  $A$ , and  $B$ , respectively.  $\frac{B_{total}}{A_{total} + B_{total}}$  represents the percentage of substrate conversion.  $\Delta FP\ signal$  represent the signal window (dynamic range) of the assay.  $FP\ signal$  represent fluorescence polarization signal value of the system.

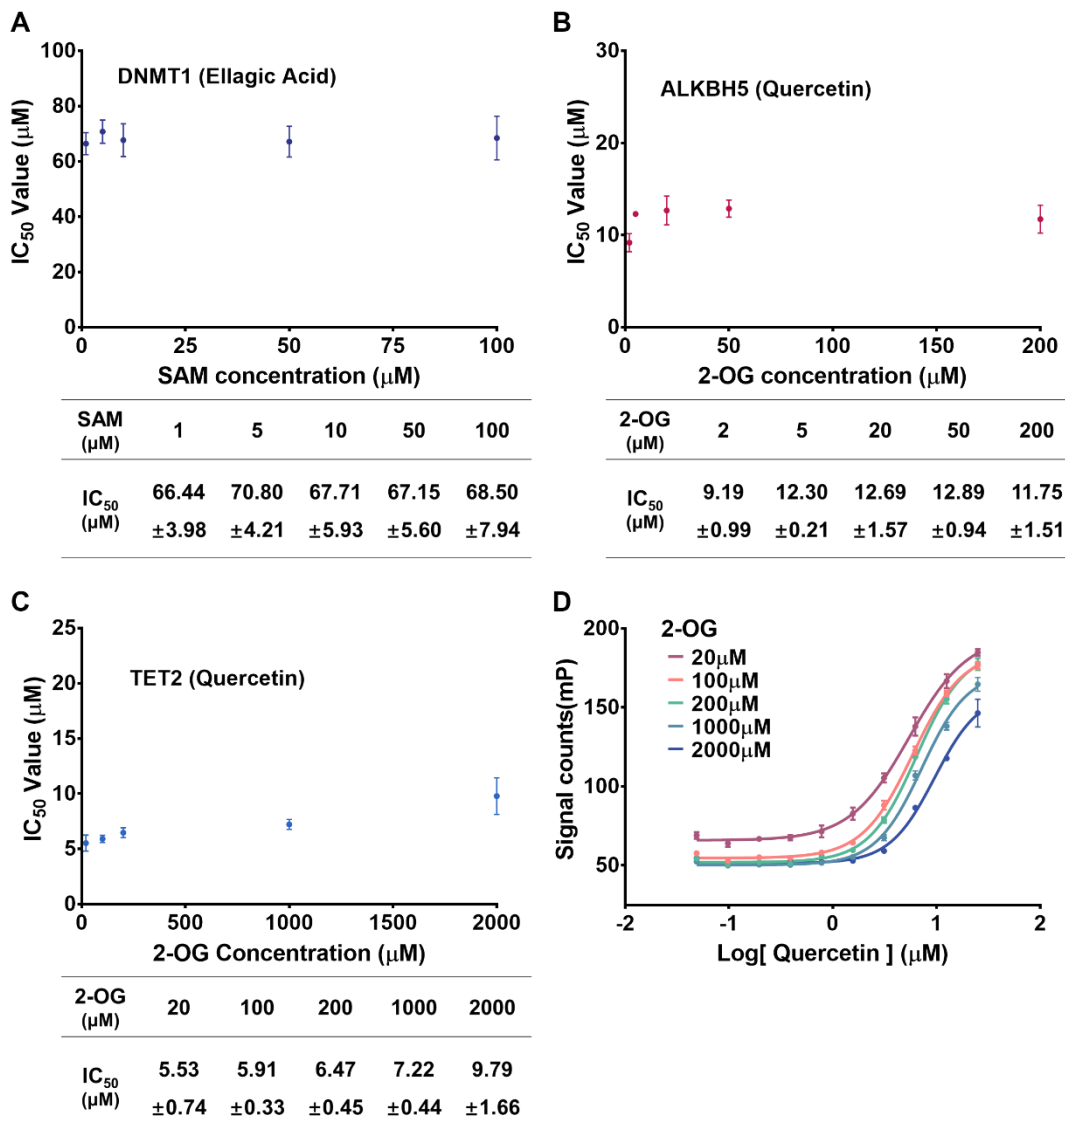

**Figure. S4.** The IC<sub>50</sub> of (A) ellagic acid in DNMT1 assay, (B) quercetin in ALKBH5 assay, (C) quercetin in TET2 assay and (D) quercetin inhibition curves of TET2. The reactions were performed in triplicate. The error bars were showed as mean ± SD (n = 3).

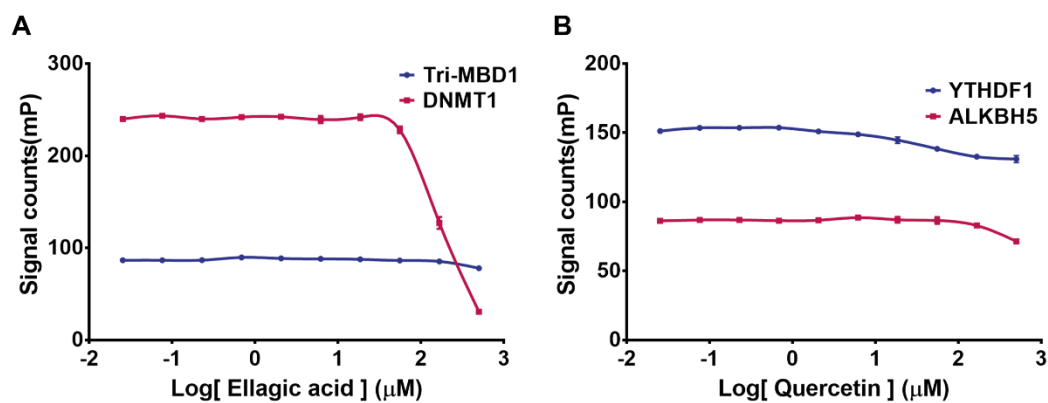

**Figure. S5.** Counter screen and enzyme binding assay of hit compounds. (A) Ellagic acid didn't interfere the assay (blue lines), and disturbed the DNA-DNMT1 interaction in the FP binding assay of DNMT1 (red lines). (B) Quercetin didn't interfere the assay (blue lines). And the compound didn't affect the RNA binding of ALKBH5 (red lines). All samples were performed in triplicate. The error bars were showed as mean  $\pm$  SD (n = 3).

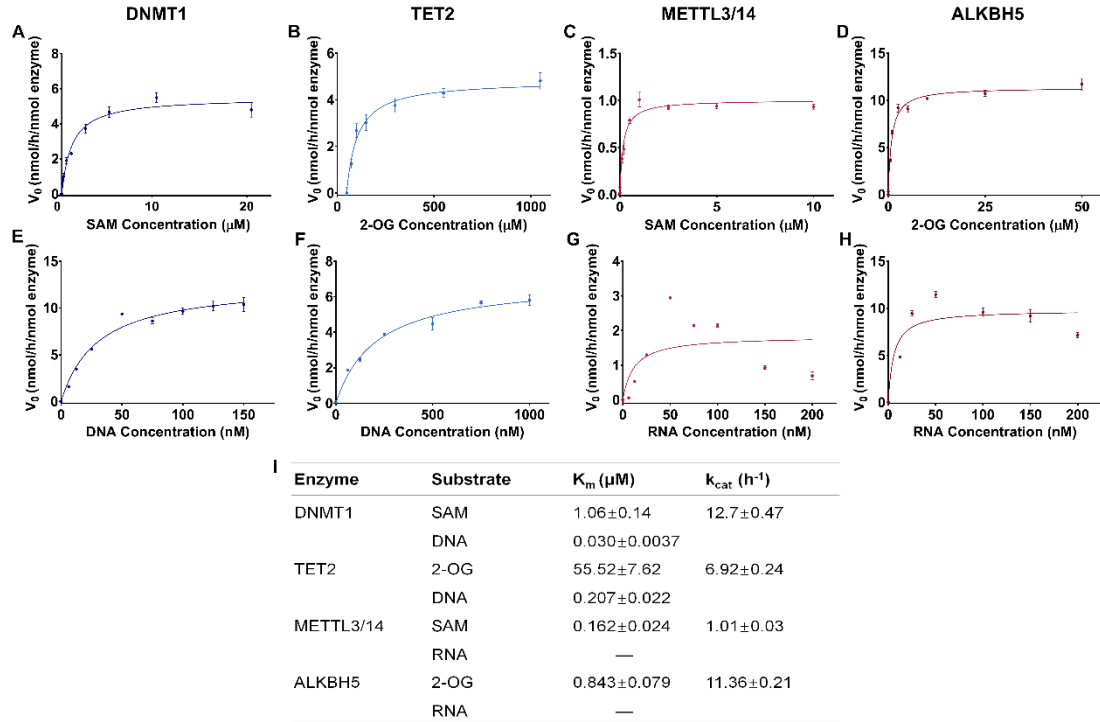

**Figure. S6.** The kinetic parameters determination of DNMT1 (A) for SAM, (E) for DNA, TET2 (B) for 2-OG, (F) for DNA, METTL3/14 (C) for SAM, (G) for RNA, and ALKBH5 (D) for 2-OG, (H) for RNA. (I) The table is the summary of the measurements. All samples were performed in triplicate. The error bars were showed as mean  $\pm$  SD ( $n = 3$ ).



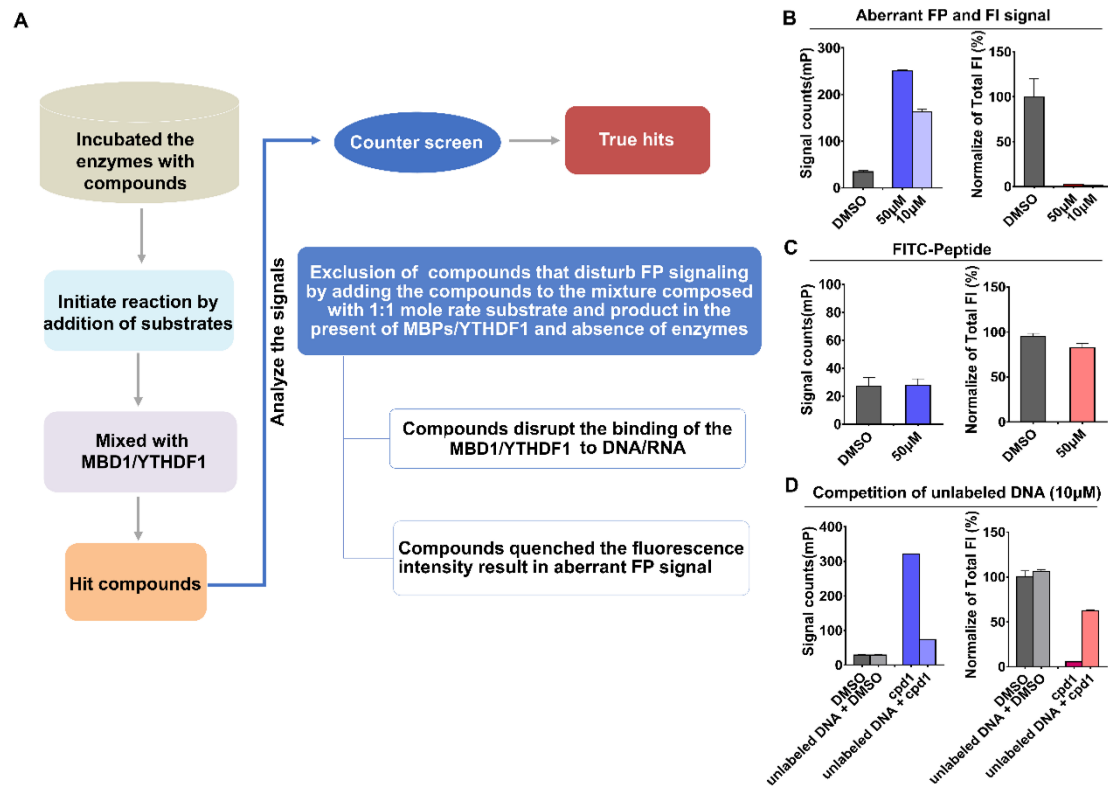

**Figure. S7.** (A) Workflow of screening and counter screening. (B) Cpd1 is a typical example compound we found that interfere the assay (DNA binder). The cpd1 interfere the assay and resulted in aberrant FP signal and fluorescence quenching (FI signal) in the presence of only compounds and DNA without enzymes. (C) The cpd1 have no significant interference to both FP and FI value of an N terminal FITC-labeled FSSNRQKILERTETLNQEWKQR peptide. (D) The aberrant FP signal and fluorescence quenching caused by cpd1 could be reversed by 10 µM unlabeled DNA.
